# Supplementary material
Source: Elsevier journal article supplement (https://comptes-rendus.academie-sciences.fr/biologies/article/10.1016/j.crvi.2009.01.003/file/attach/mmc2.pdf)
Supplement: mmc2 [file mmc2.pdf]

Appendix 2. Results of the survey on isolated trees, growing more than 5 m from the forest edge along 4 km of dirt road (880 trees monitored).

Note that *Astrocaryum sciophyllum* and *Heliconia* spp. were not presented here because they do not develop in this environment. Comparisons with plants growing in forest edges; *Brachygastra smithii*: 20 nests associated with *Vismia guianensis* for 176 *V. guianensis* individuals recorded versus 18 for 1285 individuals (calculated:  $514 \times 5/2$ ); Chi-square test:  $P < 10^{-4}$ ; *Polybia bistrriata*: 27 nests associated with *Clusia grandiflora* for 47 *C. grandiflora* individuals recorded versus 67 for 692 individuals (calculated:  $277 \times 5/2$ ); Chi-square test:  $P < 10^{-4}$ .

|                                           | <i>Clusia grandiflora</i> | <i>Vismia guianensis</i> | <i>Vismia sessilifolia</i> | <i>Vismia latifolia</i> | <i>Cecropia obtusa</i> | <i>Bellutia grandiflora</i> | <i>Mahurea palustris</i> | <i>Tococa guianensis</i> | <i>Goupia glabra</i> | Other plant species | Total wasp nests |
|-------------------------------------------|---------------------------|--------------------------|----------------------------|-------------------------|------------------------|-----------------------------|--------------------------|--------------------------|----------------------|---------------------|------------------|
| <i>Polistes + Mischocyttarus</i>          | 6*                        | 0                        | 0                          | 0                       | 0                      | 0                           | 0                        | 0                        | 0                    | 1                   | 7*               |
| <i>Brachygastra myersi</i> Bequaert       | 0                         | 1                        | 0                          | 1                       | 0                      | 0                           | 0                        | 0                        | 0                    | 0                   | 2                |
| <i>Brachygastra smithii</i> (de Saussure) | 0                         | 20                       | 1                          | 2                       | 0                      | 1                           | 0                        | 0                        | 0                    | 0                   | 24               |
| <i>Apoica arborea</i> (Christ) **         | 0                         | 0                        | 0                          | 0                       | 1**                    | 0                           | 0                        | 0                        | 0                    | 0                   | 1                |
| <i>Chartergus artifex</i> de Saussure **  | 0                         | 0                        | 0                          | 0                       | 1**                    | 0                           | 0                        | 0                        | 0                    | 0                   | 1                |
| <i>Polybia bistrriata</i> (Fabricius)     | 27                        | 3                        | 0                          | 0                       | 0                      | 0                           | 0                        | 0                        | 0                    | 1                   | 31               |
| <i>Polybia emaciata</i> Lucas             | 0                         | 2                        | 0                          | 0                       | 0                      | 0                           | 0                        | 0                        | 0                    | 0                   | 2                |
| <i>Polybia rejecta</i> (Fabricius)        | 0                         | 0                        | 1***                       | 0                       | 0                      | 0                           | 0                        | 0                        | 0                    | 0                   | 1                |
| <i>Protopolybia emortualis</i> (L.)       | 0                         | 0                        | 3                          | 0                       | 0                      | 0                           | 0                        | 0                        | 0                    | 0                   | 3                |
| Plants with wasp nests                    | 27                        | 26                       | 5                          | 3                       | 2                      | 1                           | 0                        | 0                        | 0                    | 2                   | 66               |
| Total plants monitored                    | 47                        | 176                      | 48                         | 252                     | 190                    | 72                          | 12                       | 5                        | 28                   | 49                  | 880              |
| % plants with wasp nests                  | 57.4                      | 14.8                     | 10.4                       | 1.2                     | 1.0                    | 1.4                         | 0                        | 0                        | 0                    | 6.7                 | 7.5              |

\* *Polistes pacificus* and *Mischocyttarus injucundus* nests installed under the leaves of plants also sheltering a *Polybia bistrriata* nest. \*\*

species not encountered in the baseline survey (Appendix 1). \*\*\* The *Vismia sessilifolia* sheltering the nest of *Polybia rejecta* was occupied

by *Dolichoderus bidens*.
